# Supplementary material for: Pairwise ligand exchange reactions in tetrahedral and pseudo-tetrahedral transition metal complexesElectronic supplementary information (ESI) available: Experimental procedures for synthesis of new compounds and for NMR-scale ligand exchange reactions as well as 1H NMR spectroscopic data characterising products of these reactions. See http://www.rsc.org/suppdata/dt/b3/b308062e/
Source: Royal Society of Chemistry journal article supplement (doi:10.1039/b308062e), 2003-01-01
Supplement: b308062e.doc [file b308062e.doc]

Supplementary Material

General Experimental Procedures

All air- and/or moisture-sensitive materials were prepared and manipulated under an atmosphere of oxygen-free, dry dinitrogen either in a glove-box or using standard Schlenk-line techniques. Solvents were pre-dried over activated 4Å molecular sieves (CH2Cl2) or sodium wire (diethylether, heptane, pentane and toluene) before being distilled from CaH2 (CH2Cl2), sodium metal (heptane and toluene) or LiAlH4 (diethylether and pentane) under a slow continuous stream of dinitrogen. All solvents were de-oxygenated before use either by bubbling dinitrogen through them for 15 minutes or by repeated freeze/pump/thaw cycles, each cycle being followed by admission of dinitrogen. C6D6 and CDCl3 for NMR spectroscopy were dried over P2O5 and vacuum distilled prior to use.

NMR spectra were recorded on a Varian Gemini 200 spectrometer (1H spectra were recorded at 199.98 MHz), a Bruker AC250 spectrometer (1H spectra were recorded at 250.14 MHz), a Varian VRX400 spectrometer (1H, 13C and 19F spectra were recorded at 400.13, 100.58 and 376.31 MHz respectively) or a Bruker AMX500 spectrometer (1H and 13C spectra were recorded at 499.97 and 125.70 MHz respectively). The spectra were referenced internally using the residual protio-solvent (1H) and solvent (13C) resonances and measured relative to tetramethylsilane ( 0 ppm); or referenced externally to CFCl3 (19F, 0 ppm). Chemical shifts are quoted in  (ppm) and given as (multiplicity, integral, coupling constants in Hertz, assignment).

Infrared spectra were recorded on Perkin-Elmer 577 and 457 grating spectrophotometers using CsI windows. Absorptions are quoted in cm-1 and labelled as: vs (very strong), s (strong), m (medium), w (weak), br (broad), sh (sharp). Mass spectra were recorded on a VG7070E mass spectrometer and data are quoted as m/z. Elemental analyses were performed by the microanalytical service of the Department of Chemistry at the University of Durham.

LiOR {R = tBu, C(CH3)2(CF3), C(CH3)(CF3)2, iPr},1 ((H3C)3Si)NHtBu,2 [NbCpBr4],3 [Mo(O)2Cl2],2 [Mo(O)2(OtBu)2],4 [Mo(N-2,6-iPr2C6H3)2(OtBu)2],4 [Mo(N-2,6-iPr2C6H3)-(C(H)CMe2Ph)(OR)2] {R = tBu, C(CH3)2(CF3), C(CH3)(CF3)2},2 [MoCl2(NtBu)2],5 [Mo(NtBu)2(NHtBu)2],6 [Nb(NR)Cp*Cl2] {R = (2,6-iPr2C6H3), Me)},7 [Nb(NR)CpCl2] {R = tBu, (2,6-iPr2C6H3)},7 [Ta(N-2,6-iPr2C6H3)Cp*Cl2],7 [Nb(NtBu)Cp(NHtBu)2],8 [Mo(NtBu)2CpCl]9 [and [MoQ2Cl2(DME)] {Q = (NtBu), O},10, 11 were prepared by previously reported methods.

Synthesis of New Compounds

Synthesis of [Mo(NtBu)2(OtBu)2], 2

To a mixture of [Mo(NtBu)2Cl2] (1.000 g, 3.235 mmol) and LiOtBu (0.521 g, 6.510 mmol) was added chilled (-78 ˚C) diethylether (100 cm3). The resulting mixture was allowed to warm to ambient temperature and stirred for 2 hours whereupon a pale precipitate and lime green solution formed. A free-flowing green oil (melting point 25-27 ˚C) was obtained by filtration and removal of the volatile components under reduced pressure. The oil crystallised on prolonged storage at low temperature (-5 oC). Yield 1.06 g (2.75 mmol, 85 %).

NMR Data [298 K, C6D6]: 1H [400.13 MHz] 1.38 (s, 18H, NC(CH3)3), 1.26 (s, 18H, OC(CH3)3); 13C{1H} [100.58 MHz] 77.18 (s, OC(CH3)3), 67.94 (s, NC(CH3)3), 32.44 (s, NC(CH3)3), 32.16 (s, OC(CH3)3).

Microanalytical Data [% Found (Calculated for C16H36N2MoO2)]: C 50.2 (50.0), H 9.5 (9.4), N 7.4 (7.3).

Infrared Data [Neat]: 2970s, 2925s (sh), 2900m (sh), 2880m (sh), 1545w (br), 1390m (sh), 1360s (sh), 1260s (sh), 1215s (br), 1180s (br), 1130m (sh), 1025w (br), 960s (br), 910w, 805m (sh), 785m (sh), 585s (br), 470w, 380w (br), 270w.

Mass Spectral Data [C.I.; Peaks given for 98Mo]: 387 [M + H]+, 369 [M - Me]+, 331 [M tBu + H]+, 74 [H3NtBu]+ and [H2OtBu] +, 58 [tBuH] +.

Synthesis of [MoO2(OC(CH3)2(CF3))2], 5

Chilled (-78 ˚C) diethylether (100 cm3) was added to a solid mixture of [MoO2Cl2] (1.33 g, 6.70 mmol) and Li(OC(CH3)2(CF3)) (1.80 g, 13.40 mmol) and the resulting green suspension was allowed to warm to ambient temperature. The resulting straw-coloured solution and pale precipitate were stirred for a further 2 hours at room temperature, and the solution phase was then isolated by filtration. After removal of the volatile components under reduced pressure, the analytically pure product was obtained as a pale yellow semi-crystalline solid. Yield 2.01 g (5.26 mmol, 79 %).

NMR Data [298 K, C6D6]: 1H [400.13 MHz] 1.08 (s, br, 12H, OC(CH3)2(CF3)); 13C{1H} [100.58 MHz] 125.26 (q, 1JCF = 280.4, OC(CH3)(CF3)), 84.36 (q, 2JCF = 30.6, OC(CH3)2(CF3)), 22.27 (s, OC(CH3)2(CF3)); 19F [376.31 MHz] -82.73 (s, OC(CH3)2(CF3)).

Microanalytical Data [% Found (Calculated for C8H12F6MoO2)]: C 25.4 (25.15), H 3.0 (3.2).

Infrared Data [Neat]: 3000m (sh), 2975w, 1475m, 1400m (sh), 1380m (sh), 1330s (sh), 1215w, 1110 - 1190s (v br), 1000s (br), 960s (br), 900s, 850s (sh), 800w, 775s (sh), 660m, 600m (sh), 535m, 475m, 390m (br), 340m, 265w (sh).

Synthesis of [Mo(NtBu)2(OC(CH3)2(CF3))2], 6

Chilled (-78 ˚C) diethylether (100 cm3) was added to a solid mixture of [Mo(NtBu)2Cl2] (0.537 g, 1.74 mmol) and Li(OC(CH3)2(CF3)) (0.467 g, 3.48 mmol) and the resulting suspension was allowed to warm to ambient temperature. The resulting pale green solution and white flocculent precipitate were stirred for a further 2 hours at room temperature. The solution phase was separated by filtration, concentrated to ca. 25 % volume and cooled to -78 ˚C to afford the product as a pale green microcrystalline solid (melting point 30-32 ˚C). Yield 0.66 g (1.34 mmol, 77 %).

NMR Data [298 K, C6D6]: 1H [400.13 MHz] 1.32 (q, 12H, 4JFH = 1.2, OC(CH3)2(CF3)), 1.27 (s, 18H, NC(CH3)3); 13C{1H} [100.58 MHz] 127.13 (q, 1JCF = 286.1, OC(CH3)2(CF3)), 78.80 (q, 2JCF = 28.6, OC(CH3)2(CF3)), 70.02 (s, NC(CH3)3), 31.84 (s, NC(CH3)3), 24.70 (s, OC(CH3)2(CF3)); 19F [376.31 MHz] -82.30 (s, OC(CH3)2(CF3)).

Microanalytical Data [% Found (Calculated for C16H30N2F6MoO2)]: C 39.0 (39.0), H 6.4 (6.1), N 5.6 (5.7).

Infrared Data [Neat]: 2970s, 1465w (br), 1390w (sh), 1365w (sh), 1325m (sh), 1260s, 1210s, 1160s (br), 1120s (br), 1015s (br), 900m (sh), 805s (br), 765m (sh), 645m, 600w, 540w (br), 475w (br), 385w (br), 270w.

Mass Spectral Data [C.I.; Peaks given for 98Mo]: 495 [M + H]+, 476 [M - F + H]+, 74 [H3NtBu]+, 58 [tBuH]+.

Synthesis of [MoO2(OC(CH3)(CF3)2)2], 8

To a mixture of [MoO2Cl2] (1.02 g, 5.11 mmol) and Li(OC(CH3)(CF3)2) (1.91 g, 10.20 mmol) was added chilled (-78 ˚C) diethylether (100 cm3). This mixture was allowed to warm to ambient temperature with stirring and then stirred for a further 2 hours. The resulting colourless solution was separated from an off-white precipitate by filtration, concentrated to ca. 50 % volume and cooled to -78 ˚C overnight to yield the product as fine colourless needles which were dried in vacuo. Yield 1.81 g (3.69 mmol, 72 %).

NMR Data [298 K, C6D6]: 1H [400.13 MHz] 1.11 (s br, OC(CH3)(CF3)2); 13C{1H} [100.58 MHz] 122.52 (q, 1JCF = 287.2, OC(CH3)(CF3)2), 84.92 (sept, 2JCF = 31.3, OC(CH3)(CF3)2), 16.35 (s, OC(CH3)(CF3)2); 19F [376.31 MHz] -78.12 (s, OC(CH3)(CF3)2).

Microanalytical Data [% Found (Calculated for C8H6F12MoO4)]: C 19.6 (19.6), H 1.2 (1.2).

Infrared Data [Nujol Mull]: 1310s, 1225s (br), 1150s (br), 1120s, 1085s, 970s, 920s (br), 870m (sh), 785m (sh), 725m, 700s (sh), 615m, 540w, 515m, 420w (br), 380m, 280w.

Synthesis of [Mo(NtBu)2(OC(CH3)(CF3)2)2], 9

To a mixture of [Mo(NtBu)2Cl2] (0.729 g, 2.36 mmol) and Li(OC(CH3)(CF3)2) (0.888 g, 4.72 mmol) was added chilled (-78 ˚C) diethylether (100 cm3). This mixture was allowed to warm to ambient temperature with stirring and stirred for a further 2 hours. The resulting lime green solution was separated from a pale precipitate filtration. After removal of the volatile components under reduced pressure, the product was isolated as a dark green solid (melting point 32-34 ˚C). Yield 1.17 g (1.95 mmol, 83 %).

NMR Data [298 K, C6D6]: 1H [400.13 MHz] 1.39 (sept, 6H, 4JFH = 0.8, OC(CH3)(CF3)2), 1.18 (s, 18H, NC(CH3)3); 13C{1H} [100.58 MHz] 123.89 (q, 1JCF = 288.8, OC(CH3)(CF3)2), 81.23 (sept, 2JCF = 29.8, OC(CH3)(CF3)2), 72.23 (s, NC(CH3)3), 31.32 (s, NC(CH3)3), 18.86 (s, OC(CH3)(CF3)2); 19F [376.31 MHz] -78.15 (s, OC(CH3)(CF3)2).

Microanalytical Data [% Found (Calculated for C16H24N2F12MoO2)]: C 32.0 (32.0), H 4.1 (4.0), N 4.6 (4.7).

Infrared Data [Neat,]: 2970s, 2930s, 2900m, 2870m, 1455s, 1385m (sh), 1365m (sh), 1310s (br), 1080 - 1220s (v br), 1025m, 980s, 865s (sh), 805s (sh), 770s (sh), 700s, 620m, 555m, 515m, 465w, 405w, 370w, 260m.

Mass Spectral Data [C.I.; Peaks given for 98Mo]: 603 [M + H]+, 584 [M - F + H]+, 58 [tBuH]+.

Synthesis of [Mo(NtBu)2(OiPr)2], 11

Chilled (-78 ˚C) diethylether (100 cm3) was added to a mixture of [Mo(NtBu)2Cl2•(H3COCH2CH2OCH3)] (1.00 g, 2.50 mmol) and LiOiPr (0.34 g, 5.07 mmol) and the mixture was allowed to warm to room temperature with stirring. During this time a pale yellow solution and gelatinous precipitate formed. The solution phase was isolated by filtration and after removal of the volatile components, a pale yellow oil was obtained (melting point 17-20 ˚C) which crystallised on on prolonged storage at low temperature (-5 oC). Yield 0.686 g (1.93 mmol, 77 %).

NMR Data [298 K, C6D6]: 1H [400.13 MHz] 4.71 (sept, 2H, 3JHH = 5.8, OCH(CH3)2), 1.36 (s, 18H, NC(CH3)3), 1.27 (d, 12H, 3JHH = 5.8, OCH(CH3)2); 13C{1H} [100.58 MHz] 78.30 (s, OCH(CH3)2), 69.09 (s, NC(CH3)3), 33.16 (s, NC(CH3)3), 27.35 (s, OCH(CH3)2).

Microanalytical Data [% Found (Calculated for C14H32N2MoO2)]: C 46.9 (47.2), H 9.05 (9.05), N 7.9 (8.0).

Infrared Data [Neat]: 2960s, 2915s, 2855m, 1450m, 1380m (sh), 1360s, 1330m, 1260s, 1210s (br), 1165m (sh), 1120s (br), 1025w (sh), 975s (br), 845s, 805m (sh), 795w, 620s (br), 580m, 470w, 370w, 275w.

Mass Spectral Data [C.I.; Peaks given for 98Mo]: 359 [M + H]+, 74 [H3NtBu]+, 58 [tBuH]+.

Synthesis of [Nb(NtBu)Cp(OtBu)2], 19

To a solid mixture of [Nb(NtBu)CpCl2] (0.50 g, 1.67 mmol) and LiOtBu (0.27 g, 3.34 mmol) was added chilled (-78 ˚C) diethylether (40 cm3). The mixture was allowed to warm to ambient temperature and then stirred for a further 12 hours. The resulting yellow-brown solution was separated from a pale gelatinous precipitate by filtration. After removal of the volatile components under reduced pressure, the product was obtained as a pale brown oil.

NMR Data [298 K, C6D6]: 1H [400.13 MHz] 6.16 (s, 5H, C5H5), 1.30 (s, 9H, NC(CH3)3), 1.19 (s, 18H, OC(CH3)3); 13C{1H} [100.58 MHz] 109.23 (s, C5H5), 76.14 (s, NC(CH3)3), 65.41 (s (OC(CH3)3), 32.62 (s, OC(CH3) 3), 32.13 (s, NC(CH3)3).

Infrared Data [Neat]: 3042w, 2960vs, 2767s, 1460m, 1420m, 1385m, 1360vs, 1260vs, 1230s, 1186vs, 990vs (br), 780vs, 560s, 480m, 391m, 377m, 360m.

Satisfactory microanalytical data could not be obtained due to the extreme air sensitivity of the oil.

Synthesis of [Nb(NtBu)Cp(OC(CH3)2(CF3))2], 20

Chilled (-78 ˚C) diethylether (100 cm3) was added to a solid mixture of [Nb(NtBu)CpCl2] (0.35 g, 1.18 mmol) and Li(OC(CH3)2(CF3)) (0.32 g, 2.39 mmol), The mixture was allowed to warm to room temperature with stirring and was then stirred for a further 16 hours. The resulting pale yellow solution was separated from a white flocculent precipitate by filtration. After concentration to ca. 10 % volume and cooling to -78 ˚C colourless crystals of **20** were obtained. Further concentration of the mother liquor, followed by cooling to -78 ˚C, afforded a second crop. Combined yield 0.48 g (0.99 mmol, 84 %).

NMR Data [298 K, C6D6]: 1H [400.13 MHz] 6.10 (s, 5H, C5H5), 1.32 (m, 6H, OC(CH3)(CH3)(CF3), 1.30 (m, 6H, OC(CH3)(CH3)(CF3)), 1.02 (s, 9H, NC(CH3)3); 13C{1H} [100.58MHz] 127.38 (q, 1JCF = 285.7, OC(CH3)2(CF3)), 110.43 (s, C5H5), 78.17 (q, 2JCF = 28.3, OC(CH3)2(CF3)), 66.55 (s, NC(CH3)3), 32.02 (s, NC(CH3) 3), 24.74 (s, OC(CH3)(CH3)(CF3)), 24.43 (s, OC(CH3)(CH3)(CF3)); 19F [376.31 MHz] -82.53 (s, OC(CH3)2(CF3)).

Microanalytical Data [% Found (Calculated for C17H26NF6NbO2)]: C 42.3 (42.25), H 5.5 (5.4), N 2.8 (2.9).

Infrared Data [Nujol Mull]: 1355w, 1320w (sh), 1260w (sh), 1240m, 1210w, 1190m, 1155s (br), 1120s (br), 1015s (br), 895m (sh), 795s (sh), 760w (sh), 640w (sh), 610w (sh), 535w, 525w, 475w (br), 380w (br).

Mass Spectral Data [C.I.]: 484 [M + H]+, 468 [M - Me]+.

Synthesis of [Nb(NtBu)Cp(OC(CH3)(CF3)2)2], 21

To a mixture of [Nb(NtBu)CpCl2] (0.40 g, 1.33 mmol) and Li(OC(CH3)(CF3)2) (0.50 g, 2.66 mmol) was added chilled (-78 ˚C) diethylether (100 cm3). The mixture was allowed to warm to ambient temperature with stirring and then stirred for a further 16 hours. The resulting pale brown solution was separated from a white precipitate by filtration. After removal of the volatile components under reduced pressure, the solid residue was extracted into pentane (50 cm3), concentrated by ca. 50 % and cooled to -40 ˚C to afford impure brown flakes. These were sublimed (298 K, < 10-3 mmHg) to yield the product as colourless crystals. Yield 0.61 g (1.03 mmol, 78 %).

NMR Data [298 K, C6D6]: 1H [400.13 MHz] 6.05 (s, 5H, C5H5), 1.44 (sept, 3H, OC(CH3)(CF3)2, 4JHF = 1.1), 0.92 (s, 9H, NC(CH3)3); 13C{1H} [100.58 MHz] 124.10 (q, 1JCF = 287.2, OC(CH3)(CF3)(CF3)), 123.94 (q, 1JCF = 287.2, OC(CH3)(CF3)(CF3)), 80.93 (m, OC(CH3)(CF3)2), 68.04 (s, NC(CH3)3), 31.42 (s, NC(CH3)3), 18.34 (s, OCH(CH3)(CF3)2); 19F [376.31 MHz] -77.93 (q, 4JFF = 9.4, OC(CH3)(CF3)(CF3)), -78.57 (q, 4JFF = 9.4, OC(CH3)(CF3)(CF3)).

Microanalytical Data [% Found (Calculated for C17H20NF12NbO2)]: C 34.3 (34.5), H 3.4 (3.6), N 2.2 (2.4).

Infrared Data [Nujol Mull]: 1360w, 1300m, 1210s (br), 1170s (br), 1110m (sh), 1080s (sh), 980m (sh), 865w (sh), 825w, 805m, 770m (sh), 700s (sh), 620w, 545w, 530w.

Mass Spectral Data [C.I]: 592 [M + H]+, 576 [M - Me]+, 74 [H53NtBu]+, 65 [C5H5]+, 58 [HtBu]+.

Synthesis of [Nb(NtBu)Cp(OiPr)2], 22

Chilled (-78 ˚C) diethylether (100 cm3) was added to a solid mixture of [Nb(NtBu)CpCl2] (1.00 g, 3.33 mmol) and LiOiPr (0.45 g, 6.65 mmol). The mixture was allowed to warm to room temperature with stirring and then stirred for a further 2 hours. The resulting pale yellow-orange solution was separated from a white flocculent precipitate by filtration. After removal of the volatile components under reduced pressure, the product was isolated as a pale orange free-flowing oil. Yield 0.97 g (2.79 mmol, 84 %).

NMR Data [298 K, C6D6]: 1H [400.13 MHz] 6.17 (s, 5H, C5H5), 4.74 (sept, 2H, 3JHH = 6.0, OCH(CH3)2), 1.29 (d, 6H, 3JCF = 6.0, OCH(CH3)(CH3)), 1.25 (d, 6H, 3JHH = 6.0, OCH(CH3)(CH3)), 1.17 (s, 9H, NC(CH3)3); 13C{1H} [100.58 MHz] 109.14 (s, C5H5), 78.34 (s, OCH(CH3)2), 65.47 (s, C(CH3)3), 32.90 (s, NC(CH3)3), 26.67 (s, OCH(CH3)(CH3)), 26.55 (s, OCH(CH3)(CH3)).

Microanalytical Data [% Found (Calculated for C15H28NNbO2)]: C 51.05 (51.9), H 8.25 (8.1), N 4.1 (4.0).

Infrared Data [Neat]: 3090w (br), 2965s (sh), 2920m (sh), 2860m (sh), 1595w (br), 1450m (br), 1380m (sh), 1365m (sh), 1330m (sh), 1250s, 1220m (sh), 1170m, 1125s (br), 1015m, 980s (br), 845m, 800s, 790m, 600m (br), 555w, 545w, 460w (br), 380w, 295w.

Mass Spectral Data [C.I] 348 [M + H]+, 332 [M - Me]+, 305 [M - iPr + H]+.

Synthesis of [Nb(NtBu)CpBr2], 23

To a solution of [NbCpBr4] (4.99 g, 10.45 mmol) in dichloromethane (50 cm3) was added dropwise a solution of ((H3C)3Si)NHtBu (3.02 g, 20.92 mmol) in dichloromethane (50 cm3). The mixture was stirred for 24 hours after which time an orange-brown solution had formed. The volatile components were removed under reduced pressure to give a dark orange solid. Extraction into dichloromethane (100 cm3), followed by concentration and cooling to -78 ˚C afforded orange crystals of the product. Yield 0.95 g (2.44 mmol, 23 %).

NMR Data [298 K, C6D6]: 1H [400.13 MHz] 5.89 (s, 5H, C5H5), 1.06 (s, NC(CH3)3); 13C{1H} [100.58 MHz] 111.77 (s, C5H5), 69.92 (s, NC(CH3)3), 30.18 (s, NC(CH3)3).

Microanalytical Data [% Found (Calculated for C9H14NBr2Nb)]: C 27.8 (27.8), H 3.8 (3.6), N 3.5 (3.7).

Infrared Data [Nujol Mull]: 3080w, 1600w, 1405w, 1360m (sh), 1300w, 1345m, 1220m, 1140w, 1015m (br), 840m, 800s (sh), 720m (br), 550w, 530w, 445w, 385w, 270w, 255m (sh), 240m (sh).

Mass Spectral Data [C.I.; Peaks given for 79Br]: 389 [M + H]+, 374 [M - Me]+, 317 [M - NtBu]+, 310 [M - Br + H]+, 74 [H3NtBu]+, 58 [tBuH]+.

Synthesis of [Nb(NtBu)Cp(NC4H4)2], 25

To a solid mixture of [Nb(NtBu)CpCl2] (0.77 g, 2.58 mmol) and Li(NC4H4) (0.38 g, 5.18 mmol) was added chilled (-78 ˚C) diethylether (100 cm3). The mixture was allowed to warm to ambient temperature with stirring and then stirred for a further 16 hours. The resulting pale yellow solution was separated from a pale flocculent precipitate by filtration. After concentrating to ca. 50 % volume and cooling to -40 ˚C the product was obtained as a pale yellow solid. Yield 0.30 g (0.83 mmol, 32 %).

NMR Data [298 K, C6D6]: 1H [499.87. MHz] 7.14 (m, 4H, NC4H4, H), (m, 4H, NC4H4, H), 5.83 (s, 5H, C5H5), 1.09 (s, 9H, NC(CH3)3); 13C{1H} [125.70 MHz] 133.12 (s, NC4H4, C), 109.86 (s, NC4H4, C), 109.73 (s, C5H5), 68.96 (s, NC(CH3)3), 31.75 (s, NC(CH3)3).

Microanalytical Data [% Found (Calculated for C17H22N3Nb)]: C 56.0 (56.5), H 5.9 (6.1), N 11.2 (11.6).

Infrared Data [Nujol Mull]: 3040w, 1265m, 1230m, 1155m, 1080m, 1070m, 1050m, 1025s (sh), 835w, 820m, 800m, 740m, 730s, 630m, 550w, 450w, 395w, 340w.

Mass Spectral Data [C.I.]: 362 [M + H]+, 304 [M - tBu]+, 74 [H3NtBu]+, 68 [H2NC4H4]+.

General Procedure for NMR-Scale Ligand Exchange Reactions

Typically, one equivalent of one reactant complex (38 mol) was dissolved in C6D6 (400 l) and mixed with a solution of the other reactant (38 mol), also in C6D6 (400 l) at 298 K. The resulting mixture was transferred to an NMR tube, sealed and kept frozen until the experiment was started. Monitoring of the reaction’s progress was by means of 1H NMR spectroscopy at appropriate time intervals depending on the rate of the reaction under examination. Suitable resonances were integrated to determine the concentrations of reactants and products over the course of the reaction; 1H NMR spectroscopic data for products formed by ligand exchange are given below. Each experimental rate constant determination was repeated three times.

In order to eliminate acceleration of these reactions by traces of Brønsted acid on the walls of the NMR tubes,12 they were thoroughly baked at 150 ˚C prior to use.

1H NMR Spectroscopic Data Characterising Products of Ligand Exchange Reactions

{All data obtained in C6D6 * indicates that Aryl resonances could not be distinguished owing to overlap.}

[Mo(O)(NtBu)(OtBu)2], **A1,2** [199.98 MHz, 298 K]: 1.38 (s, 9H, NC(CH3) 3), 1.25 (s, 18H, OC(CH3)3).

[Mo(O)(N-2-6-iPr2C6H3)(OtBu)2], **B1,3** [250.14 MHz, 298 K]: 7.07 (d, 2H 3JHH = 7.5, 2,6-iPr2C6H3, Hm), 6.97 (t, 1H, 3JHH = 7.5, 2,6-iPr2C6H3, Hp), 2.33 (sept, 2H, 3JHH = 6.8, CH(CH3)2), 1.35 (d, 12H, 3JHH = 6.8, CH(CH3)2), 1.26 (s, 18H, OC(CH3)3).

[Mo(NtBu)(N-2,6-iPr2C6H3)(OtBu)2], **C2,3/3,26/3,19/3,E’** [199.98 MHz, 298 K]: 7.11 (d, 2H, 3JHH = 7.6, 2,6-iPr2C6H3, Hm), 6.98 (t, 1H, 3JHH = 7.6, 2,6-iPr2C6H3, Hp), 3.73 (sept, 3JHH = 7.6, 2H, CH(CH3)2), 1.40 (s, 18H, OC(CH3)3), 1.33 (d, 12H, 3JHH = 7.6, CH(CH3)2), 1.20 (s, 9H, NC(CH3) 3).

[Mo(O)(NtBu)(OC(CH3)2(CF3))2], **D5,6** [199.98 MHz, 298 K]: 1.24 (s, 9H, NC(CH3)3), 1.21 (br m, 12H, OC(CH3)2(CF3)).

[Mo(O)(NtBu)(OC(CH3)(CF3)2)2], E8,9 [400.13 MHz, 298 K]: 1.27 (sept, 6H, 4JFH = 1.1, OC(CH3)(CF3)2), 1.14 (s, 9H, C(CH3)3).

[MoO2(OtBu)(OC(CH3)2(CF3))], **F1,15** [199.98 MHz, 298 K]: 1.11 (s br, 15H, coincident OC(CH3)3 and OC(CH2)2(CF3)).

[MoO2(OtBu)(OC(CH3)(CF3)2)], **G1,8** [199.98 MHz, 298 K]: 1.24 (sept, 3H, 4JFH = 1.1, OC(CH3)(CF3)2), 1.03 (s, 9H, OC(CH3)3).

[MoO2(OC(CH3)2(CF3))(OC(CH3)(CF3)2)], **H5,8** [199.98 MHz, 298 K]: 1.14 (sept br, 3H, OC(CH3)(CF3)2), 1.02 (m br, 6H, OC(CH3)2(CF3)).

[Mo(NtBu)2(OtBu)(OC(CH3)2(CF3))], **I2,6** [199.98 MHz, 298 K]: 1.37 (m, 6H, OC(CH3)2(CF3), 1.32 (s, 9H, NC(CH3)3), 1.30 (s, 9H, OC(CH3)3).

[Mo(NtBu)2(OtBu)(OC(CH3)(CF3)2)], **J2,9** [199.98 MHz, 298 K]: 1.49 (sept, 3H, 4JFH = 1.0, OC(CH3)(CF3)2), 1.27 (s, 9H, NC(CH3)3), 1.26 (s, 9H, OC(CH3)3).

[Mo(NtBu)2(OC(CH3)2(CF3))(OC(CH3)(CF3)2)], **K6,9** [199.98 MHz, 298 K]: 1.44 (sept, 3H, 4JFH = 1.1, OC(CH3)(CF3)2), 1.27 (m, 6H, OC(CH3)2(CF3)), 1.23 (s, 9H, NC(CH3)3).

[Mo(N-2,6-iPr2C6H3)(CHCMe2Ph)(OtBu)(OC(CH3)2(CF3))], **L4,7** [400.13 MHz, 298 K]: 11.50 (s, 1H, CHCMe2Ph), 7.34 (m, 2H, Aryl), 6.97 - 7.12 (m, 6H, Aryl), 3.86 (sept, 2H, 3JHH = 6.7, CH(CH3)2), 1.64 (s, 3H, CHC(CH3)(CH3)Ph), 1.63 (s, 3H, CH(CH3)(CH3)Ph), 1.26 (s, 6H, OC(CH3)2(CF3)), 1.23 (d, 12H, 3JHH = 6.7, CH(CH3)2), 1.22 (s, 9H, OC(CH3)3). *

[Mo(N-2,6-iPr2C6H3)(CHCMe2Ph)(OtBu)(OC(CH3)(CF3)2)], **M4,10** [400.13 MHz, 298 K]: 11.71 (s, 1H, CHC(CH3)2Ph), 6.9 - 7.3 (m, 8H, Aryl), 3.77 (sept, 2H, 3JHH = 6.8, CH(CH3)2), 1.62 (s, 3H, CH(CH3)(CH3)Ph), 1.58 (s, 3H, CH(CH3)(CH3)Ph), 1.22, (d, 12H, 3JHH = 6.8, CH(CH3)2), 1.20 (m, 3H, OC(CH3)(CF3)2), 1.18 (s, 9H, OC(CH3)3).

[Mo(N-2,6-iPr2C6H3)(CHCMe2Ph)(OC(CH3)2(CF3)) (OC(CH3)(CF3)2)], **N7,10** [400.13 MHz, 298 K]: 11.89 (s, 1H, CHCMe2Ph), 7.22 (m, 2H, Aryl), 6.92 - 7.12 (m, 6H, Aryl), 3.66 (sept, 2H, 3JHH = 6.8, CH(CH3)2), 1.57 (s, 3H, CHC(CH3)(CH3)Ph), 1.54 (s, 3H, CHC(CH3)(CH3)Ph), 1.22 (s, 6H, OC(CH3)2(CF3)), 1.19 (d, 12H, 3JHH = 6.8, CH(CH3)2), 1.19 (s, 9H, OC(CH3)3). *

[Mo(NtBu)2(OtBu)(OiPr)], **O2,11** [199.98 MHz, 298 K]: 4.70 (sept, 1H, 3JHH = 6.8, OCH(CH3)2), 1.37 (overlapping s, 18H, NC(CH3)3 and OC(CH3)3), 1.28 (d, 6H, 3JHH = 6.8, OCH(CH3)2).

[Mo(NtBu)2(OtBu)Cl], **P2,12** [199.98 MHz, 298 K]: 1.29 (s, 9H, NC(CH3)3), 1.26 (s, 9H, OC(CH3)3).

[Mo(NtBu)2(NHtBu)Cl], **Q12,13** [199.98 MHz, 298 K]: 8.10 (br s, 1H, NHC(CH3)3), 1.32 (s, 9H, NC(CH3)3), 1.14 (s, 9H, NH(CH3)3).

[Mo(NtBu)2(OtBu)(NHtBu)], **R2,13** [199.98 MHz, 298 K]: 6.62 (br s, 1H, NHC(CH3)3), 1.42 (s, 9H, OC(CH3)3), 1.40 (s, 9H, NC(CH3)3), 1.26 (s, 9H, NHC(CH3) 3).

[Nb(NtBu)Cp*Cl2], **S16,18/5,16** [400.13 MHz, 298 K]: 1.87 (s, 15H, C5 (CH3) 5), 1.18 (s, 9H, NC(CH3)3).

[Ta(NMe)Cp*Cl2], **T15a,17**: resonances not detected owing to overlap.

[Nb(N-2,6-iPr2C6H3)Cp(OtBu)2], **U3,19** [250.14 MHz, 298 K]: 6.9 - 7.1 (m, 3H, 2,6-iPr2C6H3), 6.16 (s, 5H, C5H5), 4.11 (sept, 2H, 3JHH = 7.0, CH(CH3)2), 1.33 (d, 12H, 3JHH = 7.0, CH(CH3)2), 1.29 (s, 18H, OC(CH3)3). *

[Nb(NtBu)Cp(OtBu)(OC(CH3)2(CF3))], **V19,20** [199.98 MHz, 298 K]: 6.13 (s, 5H, C5H5), 1.38 (m, 3H, OC(CH3)(CH3)(CF3)), 1.36 (m, 3H, OC(CH3)(CH3)(CF3)), 1.26 (s, 9H, OC(CH3)3), 1.11 (s, 9H, NC(CH3)3).

[Nb(NtBu)Cp(OtBu)(OC(CH3)(CF3)2)], **W19,21** [199.98 MHz, 298 K]: 6.10 (s, 5H, C5H5), 1.51 (sept, 3H, 4JFH = 1.1, OC(CH3)(CF3)2), 1.23 (s, 9H, OC(CH3)3), 1.04 (s, 9H, NC(CH3)3).

[Nb(NtBu)Cp(OC(CH3)2(CF3))(OC(CH3)(CF3)2)], **X20,21** [199.98 MHz, 298 K]: 6.07 (s, 5H, C5H5), 1.45 (sept, 3H, 4JFH = 1.1, OC(CH3)(CF3)2), 1.29 (m, 6H, OC(CH3)2(CF3)), 0.96 (s, 9H, NC(CH3)3).

[Nb(NtBu)Cp(OtBu)(OiPr)], **Y19,22** [199.98 MHz, 298 K]: 6.17 (s, 5H, C5H5), 4.72 (sept, 1H, 3JHH = 5.9, OCH(CH3)2), 1.34 (s, 9H, OC(CH3)3), 1.25 (d, 6H, OCH(CH3)2), 1.17 (s, 9H, NC(CH3)3).

[Nb(NtBu)CpBrCl], **Z16,23** [199.98 MHz, 298 K]: 5.88 (s, 5H, C5H5), 1.04 (s, 9H, NC(CH3)3).

[Nb(NtBu)CpCl(OtBu)], **A'2,12/16,19** [199.98 MHz, 298 K]: 6.06 (s, 5H, C5H5), 1.27 (s, 9H, OC(CH3)3), 1.11 (s, 9H, NC(CH3)3).

[Nb(NtBu)CpCl(NHtBu)], **B'12,13/16,24** [199.98 MHz, 298 K]: 7.6 (br s, 1H, NHC(CH3)3), 5.87 (s, 5H, C5H5), 1.25 (s, 9H, HNC(CH3)3), 1.18 (s, 9H, NC(CH3)3).

[Nb(NtBu)Cp(OtBu)(NHtBu)], **C'2,13/19,24** [199.98 MHz, 298 K]: 6.02 (s, 5H, C5H5), 5.6 (br s, 1H, NHC(CH3)3), 1.35 (s, 9H, OC(CH3)3), 1.28 (s, 9H, NHC(CH3)3), 1.24 (s, 9H, NC(CH3)3).

[Nb(NtBu)CpCl(NC4H4)], **D'16,25** [400 MHz, 298 K]: 7.18 (m, 2H, NC4H4), 6.39 (m, 2H, NC4H4), 5.86 (s, 5H, C5H5), 1.06 (s, 9H, NC(CH3)3).

[Mo(NtBu)(N-2,6-iPr2C6H3)CpCl], **E'3,26** [199.98 MHz, 298 K]: 6.9 - 7.1 (m, 3H, 2,6-iPr2C6H3), 6.03 (s, 5H, C5H5), 3.63 (sept, 4H, 3JHH = 6.9, CH(CH3)2), 1.29 (d, 6H, 3JHH = 6.9, CH(CH3)(CH3)), 1.26 (d, 6H, 3JHH = 6.9, CH(CH3)(CH3)), 1.19 (9H, NC(CH3)3). *

[Mo(N-2,6-iPr2C6H3)2CpCl], **F'3,E’/C,E’** [199.98 MHz, 298 K]: 6.9 - 7.1 (m, 3H, 2,6-iPr2C6H3), 6.08 (s, C5H5), 3.68 (sept, 4H, 3JHH = 6.8, CH(CH3)2), 1.16 (d, 24H, 3JHH = 6.8, CH(CH3)2). *

[Mo(NMe)(NtBu)CpCl], **G'17,26**: compound precipitated from NMR tube reaction.

[Mo(O)(tBuN)Cl2(DME)], **H'27,28** [499.98 MHz, 298 K]: 3.41 (s, 6H, H3COCH2), 3.00 (s, 4H, H3COCH2), 1.41 (s, NC(CH3)3).

Preparative Scale Synthesis of [Mo(O)(NtBu)(OtBu)2], A1,2

To a solution of [Mo(NtBu)2(OtBu)2] (0.30 g, 0.79 mmol) in toluene (25 cm3) was added a solution of [MoO2(OtBu)2] (0.21 g, 0.78 mmol), also in toluene (25 cm3). The resulting mixture was stirred for 90 minutes before removal of the volatile components under reduced pressure. Recrystallisation of the residue from pentane (10 cm3, -78 ˚C) yielded the product as a pale brown amorphous powder. Sublimation (298 K, < 10-3 mmHg) afforded a colourless crystalline material. Yield 0.33 g (1.00 mmol, 64 %). This compound is unstable in solution owing to the ligand exchange reaction to yield [MoO2(OtBu)2] and [Mo(NtBu)2(OtBu)2]; NMR spectroscopic data were obtained by freezing a sample and warming to ambient temperature immediately before acquisition.

NMR Data [298 K, C6D6]: 1H vide supra; 13C{1H} [100.58 MHz] 79.82 (s, OC(CH3)3), 70.74 (s, NC(CH3)3), 31.47 (s, OC(CH3)3), 30.75 (s, NC(CH3)3).

Microanalytical Data [% Found (Calculated for C12H27NMoO3)]: C 42.5 (43.8), H 4.0 (4.25), N 5.6 (5.5).

Infrared Data [Nujol Mull]: 1370m, 1265m, 1235w (br), 1170m (br), 1090m (br), 1020m (br), 950s, 930s (sh), 795s (br), 720w, 590w.

Mass Spectral Data [C.I.; Peaks given for 98Mo]: 332 [M + H]+, 74 [H3NtBu]+, 58 [tBuH]+.

Preparative Scale Synthesis of [Mo(NtBu)(N-2,6-iPr2C6H3)(OtBu)2], C2,3

To a mixture of [Mo(NtBu)2(OtBu)2] (1.01 g, 2.63 mmol) and [Mo(N-2,6-iPr2C6H3)2(OtBu)2] (1.56 g, 2.63 mmol) was added heptane (100 cm3) and the mixture warmed to 60 ˚C for 7 days. The volatile components were removed under reduced pressure and the product crystallised from pentane (20 cm3) at -20 ˚C as a yellow-orange solid. Yield 0.40 g, (0.82 mmol, 16 %).

NMR Data [298 K, C6D6]: 1H vide supra; 13C{1H} [100.58 MHz] 154.75 (s, 2,6-iPr2C6H3, Cipso), 141.67 (s, 2,6-iPr2C6H3, Co), 124.45 (s, 2,6-iPr2C6H3, Cp), 122.68 (s, 2,6-iPr2C6H3, Cm), 78.17 (s, OC(CH3) 3), 71.61 (s, NC(CH3)3), 32.35 (s, OC(CH3)3), 32.09 (s, NC(CH3)3), 28.57 (s, CH(C(CH3)2), 23.70 (s, CH(CH3)2).

Microanalytical Data [% Found (Calculated for C24H43N2MoO2)]: C 59.4 (59.0), H 9.0 (9.1), N 5.4 (5.7).

Infrared Data [Nujol Mull]: 2970s, 2925s (sh), 2900m (sh), 2880m (sh), 1545w (br), 1390m (sh), 1360s (sh), 1260s (sh), 1215s (br), 1180s (br), 1130m (sh), 1025w (sh), 960s (br), 910w, 805m (sh), 785m (sh), 585s (br), 470w, 380w (br), 270w.

Mass Spectral Data [C.I.; Peaks given for 98Mo]: 491 [M + H]+, 178 [H3N(2,6-iPr2C6H3)]+, 74 [H3NtBu or H2OtBu]+, 58 [tBuH]+.

Preparative Scale Synthesis of [Mo(O)(NtBu)Cl2(DME)], H'27,28

To a mixture of [MoO2Cl2(H3COCH2CH2OCH3)] (0.21 g, 0.73 mmol) and [Mo(NtBu)2Cl2(H3COCH2CH2OCH3)] (0.29 g, 0.73 g) was added diethylether (100 cm3) and the mixture stirred for 5 days. After this time a yellow solution had formed; the mixture was filtered, the volatile components removed under reduced pressure and the residue recrystallised from diethylether at -78 ˚C to yield the product as a pale green powder. Yield 0.13 g (0.38 mmol, 26 %).

NMR Data [298 K, C6D6]: 1H vide supra; 13C{1H} [125.70 MHz] 74.86 (s, NC(CH3)3), 70.60 (s, H3COCH2), 63.27 (s, H3COCH2), 27.80 (s, NC(CH3)3).

Microanalytical Data [% Found (Calculated for C24H43N2MoO2)]: C 27.8 (27.9), H 5.6 (5.6, N 3.5 (4.1).

Infrared Data [Nujol Mull]: 1260w, 1230w, 1080m (br), 1040s (br), 1015m (br), 910s (sh), 860s (sh), 800m (br), 335m (br).

Mass Spectral Data [C.I.; Peaks given for 98Mo and 35Cl]: 240 [Mo(O)Cl2•C4H8]+, 225 [Mo(O)Cl2•C3H5]+, 184 [Mo(O)Cl2]+, 149 [Mo(O)Cl]+, 57 [tBu]+.

References

1 T. V. Lubben, P. T. Wolczanski, and G. D. v. Duyne, *Organometallics*, 1984, **3**.

2 R. R. Schrock, J. S. Murdzek, G. C. Bazan, J. Robbins, M. DiMare, and M. O'Regan, *J. Am. Chem. Soc.*, 1990, **112**, 3875.

3 M. J. Bunker, A. D. Cian, M. L. H. Green, J. J. E. Moreau, and N. Siganporia, *J. Chem. Soc., Dalton Trans.*, 1980, 2155.

4 M. Jolly, J. P. Mitchell, and V. C. Gibson, *J. Chem. Soc. Dalton Trans.*, 1992, 1331.

5 J. A. Osborn, J. Kress, and G. Schoettel, *J. Chem. Soc., Chem. Commun.*, 1989, 1062.

6 A. A. Danopoulos, G. Wilkinson, B. Hussain-Bates, and M. B. Hursthouse, *J. Chem. Soc., Dalton Trans.*, 1990, 2753.

7 D. N. Williams, J. P. Mitchell, A. D. Poole, U. Siemeling, W. Clegg, D. C. R. Hockless, P. A. O'Neil, and V. C. Gibson, *J. Chem. Soc., Dalton Trans.*, 1992, 729.

8 M. J. Humphries, M. L. H. Green, M. A. Leech, V. C. Gibson, M. Jolly, D. N. Williams, M. R. J. Elsegood, and W. Clegg, *J. Chem. Soc., Dalton Trans.*, 2000, 4044.

9 J. Sundermayer, *Chem. Ber.*, 1991, 1977.

10 P. W. Dyer, V. C. Gibson, J. A. K. Howard, B. Whittle, and C. Wilson, *J. Chem. Soc., Chem. Commun.*, 1992, 1666.

11 H. H. Fox, K. B. Yap, J. Robbins, S. Cai, and R. R. Schrock, *Inorg. Chem.*, 1992, **31**, 2287.

12 I. J. Blackmore, V. C. Gibson, A. J. Graham, M. Jolly, E. L. Marshall, and B. P. Ward, *J. Chem. Soc., Dalton Trans.*, 2001, 3242.
